# High-resolution analysis of the peptidoglycan composition in *Streptomyces coelicolor*

Lizah T. van der Aart<sup>1</sup>, Gerwin K. Spijksma<sup>2</sup>, Amy Harms<sup>2</sup>, Waldemar Vollmer<sup>3</sup>, Thomas Hankemeier<sup>2</sup> and Gilles P. van Wezel<sup>1,4\*</sup>

1: Molecular Biotechnology, Institute of Biology, Leiden University, Sylviusweg 72, P.O. Box 9502, 2300RA Leiden, The Netherlands

2: Division of Analytical Biosciences, Leiden Academic Centre for Drug Research, Leiden University, The Netherlands

3: Centre for Bacterial Cell Biology, Institute for Cell and Molecular Biosciences, Newcastle University, Newcastle upon Tyne, United Kingdom

4: Department of Microbial Ecology, Netherlands, Institute of Ecology (NIOO-KNAW) Droevendaalsteeg 10, Wageningen 6708 PB, The Netherlands

\*Corresponding author. Tel: +31 715274310; Email: [g.wezel@biology.leidenuniv.nl](mailto:g.wezel@biology.leidenuniv.nl)

Running title: Peptidoglycan analysis of *Streptomyces coelicolor*

Keywords: Cell wall; Streptomyces; Mass spectrometry; Multicellular growth; Sporulation; Programmed Cell Death

## ABSTRACT

The bacterial cell wall maintains cell shape and protects against bursting by the turgor. A major constituent of the cell wall is peptidoglycan (PG), which is continuously modified to allow cell growth and differentiation through the concerted activity of biosynthetic and hydrolytic enzymes. Streptomycetes are Gram-positive bacteria with a complex multicellular life style alternating between mycelial growth and the formation of reproductive spores. This involves cell-wall remodeling at apical sites of the hyphae during cell elongation and autolytic degradation of the vegetative mycelium during the onset of development and antibiotic production. Here, we show that there are distinct differences in the cross-linking and maturation of the PG between exponentially growing vegetative hyphae and the aerial hyphae that undergo sporulation. LC-MS/MS analysis identified over 80 different mucopeptides, revealing that major PG hydrolysis takes place over the course of mycelial growth. Half of the dimers lack one of the disaccharide units in transition-phase cells, most likely due to autolytic activity. De-acetylation of MurNAc to MurN was particularly pronounced in spores, suggesting that MurN plays a role in spore development. Taken together, our work highlights dynamic and growth phase-dependent construction and remodeling of PG in *Streptomyces*.

## IMPORTANCE

Streptomycetes are bacteria with a complex lifestyle, which are model organisms for bacterial multicellularity. From a single spore a large multigenomic, multicellular mycelium is formed, which differentiates to form spores. Programmed cell death is an important event during the onset of morphological differentiation. In this work we

provide new insights into the changes in the peptidoglycan architecture over time, highlighting changes over the course of development and between growing mycelia and spores. This revealed dynamic changes in the peptidoglycan when the mycelia age, showing extensive PG hydrolysis and in particular an increase in the proportion of 3-3-cross-links. Additionally, we identified a mucopeptide that is highly abundant specifically in spores, which may relate to dormancy and germination.

## INTRODUCTION

Peptidoglycan (PG) is a major component of the bacterial cell wall. It forms a physical boundary that maintains cell shape, protects cellular integrity against the osmotic pressure and acts as a scaffold for large protein assemblies and exopolymers (66). The cell wall is a highly dynamic macromolecule that is continuously constructed and deconstructed to allow for cell growth and to meet environmental demands (27). PG is built up of glycan strands of alternating N-acetylglucosamine (GlcNAc) and N-acetylmuramic acid (MurNAc) residues that are connected by short peptides to form a mesh-like polymer. PG biosynthesis starts with the synthesis of PG precursors by the Mur enzymes in the cytoplasm and cell membrane, resulting in lipid II precursor, undecaprenylpyrophosphoryl-MurNAc(GlcNAc)-pentapeptide. Lipid II is transported across the cell membrane by MurJ and/or FtsW/SEDS proteins and the PG is polymerized and incorporated into the existing cell wall by the activities of glycosyltransferases and transpeptidases (9, 30, 57).

The Gram-positive model bacterium *Bacillus subtilis* grows via lateral cell wall synthesis followed by binary fission; in addition, *B. subtilis* forms heat- and desiccation-resistant spores (23, 48). By contrast, the vegetative hyphae of the mycelial *Streptomyces* grow by extension of the hyphal apex and cell division results in connected compartments separated by cross-walls (2, 7, 11). This makes *Streptomyces* a model taxon for bacterial multicellularity (8). Multicellular vegetative growth poses different challenges to *Streptomyces*, including the synthesis of many chromosomes during vegetative growth and separation of the nucleoids in the large multi-genomic compartments during cross-wall formation (22, 68). Stress conditions such as nutrient depletion trigger the development of a so-called aerial mycelium which feeds on the underlying vegetative or substrate mycelium. The aerial hyphae

eventually differentiate into chains of spores, a process whereby many spores are formed almost simultaneously, requiring highly complex coordination of nucleoid segregation and condensation and multiple cell division (22, 36, 41). Streptomycetes have an unusually complex cytoskeleton, which plays a role in polar growth and cell-wall stability (6, 19).

The *Streptomyces* genome encodes a large number of cell wall-modifying enzymes, such as cell wall hydrolases (autolysins), carboxypeptidases and penicillin-binding proteins (PBPs), a complexity that suggests strong heterogeneity of their PG (15, 45). Several concepts that were originally regarded as specific to eukaryotes also occur in bacteria, such as multicellularity (8, 31, 58), and programmed cell death (18, 51). Programmed cell death (PCD) likely plays a major role in the onset of morphological development, required to lyse part of the vegetative mycelium to provide the nutrients for the aerial hyphae (34, 38). PCD and cell-wall recycling are linked to antibiotic production in *Streptomyces* (33, 62).

All disaccharide peptide subunits (muropeptides) in the PG are variations on the basic building block present in lipid II, which in *Streptomyces* typically consists of GlcNAc-MurNAc-L-Ala-D-Glu-LL-DAP(Gly)-D-Ala-D-Ala (21, 56). Here, we have analyzed the cell wall composition of vegetative mycelium and mature spores of *Streptomyces coelicolor* by LC-MS, to obtain a detailed inventory of the monomers and dimers in the cell wall. This revealed extensive cell wall hydrolysis and remodeling during vegetative growth and highlights the difference in cell wall composition between vegetative hyphae and spores.

# RESULTS AND DISCUSSION

## PG isolation and analysis

*Streptomyces* form long hyphae and eventually large mycelial networks in submerged cultures (64). To assess how this translates to variations in the PG composition, we isolated the PG and analyzed the mucopeptide profile of spores and of vegetative hyphae during different phases of growth in liquid-grown cultures. Vegetative mycelia of *S. coelicolor* were harvested from liquid minimal medium (NMM+). Samples taken after 18 and 24 h represented exponential growth, while samples taken after 36 h and 48 h represented mycelia in transition phase (Figure 1). Spores were harvested from SFM agar plates and filtered to exclude larger mycelial structures, all samples were taken in triplicate.

To allow analyzing a large number of samples simultaneously and in a reasonable time frame, we adapted a method for rapid PG purification (25) for *S. coelicolor*. For this, crude cell-wall material was isolated by boiling cells in 0.25% SDS and secondary cell wall polymers such as teichoic acids were removed by HCl. (see Materials and Methods section for details). As a control for the validity of the method, it was compared to a more elaborate method which is more routinely used (4), whereby *S. coelicolor* mycelia were treated with 5% boiling SDS and subsequently treated with hydrofluoric acid (HF) to remove teichoic acids. Comparison of the two methods revealed comparable outcomes between the two methods in peak detection (Table S3). Therefore, we proceeded with the method using 0.25%SDS and HCl.

The isolated PG was digested with mutanolysin (13, 25) and the mucopeptide composition was analyzed by liquid chromatography linked to mass spectrometry (LC-MS). Every sample was analyzed three times and every sample in this dataset is

run in the same sequence, to decrease possible deviations in retention time between the samples. Peaks were identified in the  $m/z$  range from 500-3000 Da, whereby different  $m/z$  in co-eluting peaks were further characterized by MS/MS. The eluted  $m/z$  values were compared to a dataset of theoretical masses of predicted muropeptides. Table 1 shows a summary of the monomers and dimers detected; the full datasets are given in Tables S1 and S2. We identified several modifications, including the amidation of D-iGlu to D-iGln at position 2 of the stem peptide, deacytation of MurNAc to MurN, removal of amino acids to generate mono-, di-, tri- and tetrapeptides, loss of LL-DAP-bound glycine, and the presence of Gly (instead of Ala) at position 1,4 or 5. The loss of GlcNac or GlcNac-MurNAc indicates hydrolysis (Figure 2).

### **Fast growth rate correlates with high pentapeptide content**

The first muropeptide after incorporation of Lipid II by glycosyltransferases contains a pentapeptide with a Gly residue linked to LL-DAP[3]. In many bacteria pentapeptides are short-lived muropeptides that occur mostly at sites of cell wall and cell division (26, 39). This is reflected by the high abundance of pentapeptides in the mycelia during exponential growth, with a pentapeptide content of 21% during early exponential growth (18 h) and 14% during late exponential growth (24 h) as compared to 11% in transition-phase cultures (36 h and 48 h). Conversely, tripeptides increased over time, from 24% during early exponential phase to 32% in transition-phase cultures.

### **D-Ala is sometimes substituted for Gly**

Gly can replace L-Ala[1] at position 1, or D-Ala[4/5] at positions 4 or 5 in in the pentapeptide. Addition of Gly to the medium and, in consequence, incorporation of Gly in the peptidoglycan can cause changes in morphology (16, 60) and facilitates lysozyme-mediated formation of protoplasts in *Streptomyces*, which was used to develop protoplast transformation methods (20, 24, 43). Gly at position 4 and 5 are incorporated in the murein, whether Gly at position 1 is incorporated at precursor level (60). Tetrapeptides carrying Gly at position 4 increased from 3% at 18 h, (exponential growth) to 8% at 48 h (transition and stationary phases) as the vegetative mycelium aged. The relative abundance of pentapeptides carrying Gly at position 5 was stable between 4-5% during growth.

### **The abundance of 3-3 cross-links increases over time**

It is possible to distinguish between two types of peptidoglycan cross-linking due to the difference in retention time and the application of MS/MS. These two types of cross-links are formed via two separate mechanism, the canonical D,D-transpeptidases (PBPs) produce a 3-4 (D,D) cross-links between LL-DAP[3] and D-Ala[4] and L,D-transpeptidases form 3-3 (L,D) cross-links between two LL-DAP[3] residues (Figure 2A). Dimers containing a tripeptide and a tetrapeptide (TetraTri) can have either cross-link, giving rise to isomeric forms that elute at different retention times, allowing for assessment by MS/MS (Figures 3A and 3B). We have found that the ratio of 3-3 cross-linking increased over time towards transition phase; the relative abundance increased from 37% of the total amount of dimers at 18 h (exponential phase) to 57% of all dimers at 48 h (Figure 2C).

### **PG hydrolysis products increases as the culture ages**



PG hydrolysis is associated with processes such as separation of daughter cells after cell division and autolysis, and in *E. coli* and other species deletion mutants lacking PG amidases grow in chains of unseparated cells (17, 67). Our data show that over the course of the growth curve, *S. coelicolor* increasingly lost GlcNAc and GlcNAc-MurNAc residues (Table 1); these are signs of cleavage by an N-acetylglucosamine and N-acetylmuramoyl-L-alanine amidase, respectively. The amount of dimers lacking GlcNAcMurNAc increases in time from 24% at 18 h to 56% at 48 h. Figure 3C shows MS/MS profiles of a Tri-Tri-dimer with a single set of glycans.

### **Deacetylation of MurNAc is associated with mycelial aging**

N-deacetylation of PG glycan strands is widespread among bacteria (65), which can occur both at GlcNAc and at MurNAc. Modifications to the glycan strand are commonly linked to lysozyme resistance (37). In the case of *S. coelicolor*, the only glycan modification is the deacetylation of MurNAc to MurN. Our data shows that this modification becomes more prominent as the vegetative mycelium ages, from 5% during early growth to 8% during later growth stages.

### **MurN-Tri is prevalent in spores**

The PG composition of spores and vegetative mycelia was compared to get more insights into the possible correlations between PG composition and important processes such as dormancy and germination. Our data show that mucopeptides in spores are strongly biased for tetrapeptides, which make up 44% of the monomers, as compared to 23-25% of the vegetative PG. Conversely, pentapeptides were found in much lower amounts in spores at 5% of the monomers, whereas vegetative hyphae carry 10-22% of pentapeptides depending on the growth speed. A previous

study has shown that a mutation in a D-alanyl-D-alanine carboxypeptidase (*dacA*) disrupts spore maturation and germination, where one could influence the other. This indicates that either pentapeptides inhibit spore maturation, or that a high amount of tetrapeptides is essential (53). The muropeptide that stood out in the analysis of the spore PG was a tripeptide which lacks GlcNAc and contains a deacetylated MurNAc, called MurN-Tri. In spores, MurN-Tri made up 3.5% of the monomers, whereas the less modified muropeptide, GlcNAcMurN-Tri only made up 0.2% of the monomers. This suggests that MurN-tri is a spore-specific molecule. Glycan strand modifications are sometimes associated with germination site recognition (50), and we therefore speculate that the de-acetylated MurNAc residues could be recognized as germination sites of *Streptomyces* spores.

## Implications for the biology of actinobacteria

Sporulation is a key feature of *Streptomyces* biology and the spore wall is a major line of defense against environmental stresses, allowing the bacteria to survive under adverse conditions such as heat and cold stress, osmotic pressure, starvation or drought (44, 63). The spores are spread by e.g. insects or the wind, and germinate again in a new environment, as soon as the right conditions are met. Not much is known about the environmental and genetic factors that control the onset of germination. In terms of the genetics, we have previously shown that mutants deficient for the cAMP-receptor protein Crp have a much thicker spore wall, presumably due to reduced expression of cell-wall hydrolases and consequently germinate slowly (46). Additionally, Crp is a positive regulator of secondary metabolite production where the expression of Crp increases undecylprodigiosin production (12). Conversely, strains over-expressing the cell-division activator protein

SsgA show an increase in the number of germ tubes per spore (42), with on average three germ tubes emerging from a single spore (instead of the two in wild-type spores and significantly less than that in *ssgA* mutants). It is yet unclear how future sites of branching in the hyphae or germination in the spores are marked. However, even after very long storage of spores, germination still occurs at the spore 'poles', suggesting physical marks to the PG, such as rare modifications. Yet, in our analysis, we did not find rare muropeptide moieties such as muramic  $\delta$ -lactam, which is found in the spore-coat of *B. subtilis* (49). The only major difference was the relatively high amount of MurN-Tri in the spore PG (see above). It will be interesting to see why this moiety is overrepresented in the spore PG.

L,D-transpeptidases (LDTs) are especially prevalent in the actinobacterial genera *Mycobacterium*, *Corynebacterium* and *Streptomyces*, and, suggestively, these bacteria have a much higher percentage of 3-3 cross-links, with an abundance of at least 30% 3-3-cross links in investigated actinobacterial peptidoglycan. as compared to bacteria with lateral cell-wall growth such as *E. coli* (<10%) and *E. faecium* (3%) (5, 21, 28). LDTs attach to D-Ala[4] and form a cross-link between glycine and LL-DAP[3], D-Ala[5] is considered a donor for this type of cross-link (32). An interesting feature of these two mechanisms is that 3-4 cross-links can only be formed when a pentapeptide is present to display the D-Ala[5] donor, whereas 3-3 cross-links can be formed with a tetrapeptide as a donor strand. The ability to form 3-3 cross-links coincides with the ability to cross-link tetrapeptides instead of pentapeptides. We suggest that 3-3 cross-links could be essential to remodel the spore wall, using currently available muropeptides contrary to newly constructed pentapeptides (29, 54, 55).

## **The cell wall and programmed cell death**

Evidence is accumulating that, like eukaryotes, bacteria undergo a process of programmed cell death (PCD). Bacterial multicellularity implies a lifestyle involving cellular heterogeneity and the occasional sacrifice of selected cells for the benefit of survival of the colony (70-72). PCD is likely a major hallmark of multicellularity (8), and has been described in the biofilm-forming *Streptococcus* (14) and *Bacillus* (10), in Myxobacteria that form fruiting bodies (59), in the filamentous cyanobacteria (3, 40), and in the branching *Streptomyces* (35, 38, 61). In streptomycetes, cell-wall hydrolases support developmental processes like branching and germination (15). Additionally, PCD is likely an important event during the onset of development from a vegetative lifestyle to a reproductive lifestyle, as autolytic degradation of the cell wall is intrinsically linked with the onset of antibiotic production and spore formation (61). Conceptually, GlcNAc accumulates at high concentrations around colonies during PCD, and GlcNAc is an important signaling molecule for the onset of morphological differentiation and antibiotic production in streptomycetes (52, 62). The linkage of PCD and antibiotic production is logical from a biological perspective; autolytic dismantling of the vegetative (substrate) mycelium generates building blocks in a nutrient-depleted soil, which will inevitably attract motile competitors. Antibiotics likely serve to fend off these competitors and protect the food source. Thus, cell-wall hydrolysis may facilitate the correct timing of development. As shown in this work, *Streptomyces coelicolor* carries 'scars' of previous cell-wall hydrolysis events during the entire lifecycle, which emphasizes the importance of such hydrolysis to support cell growth.

## **CONCLUSIONS**

We have provided a detailed analysis of the peptidoglycan of *Streptomyces* mycelia and spores, and developed a reliable and fast method to compare larger numbers of samples. Our data show significant changes over time, among which changes in the amino acid chain, hydrolysis of dimers, and the accumulation of the rare MurN-Tri specifically in the spores. The cell wall likely plays a major role in the development of streptomycetes, with implications for germination and the switch to development and antibiotic production (via PCD-released cell wall components). The dynamic process that controls the remodeling of the cell wall during tip growth is poorly understood, but we anticipate that the local cell-wall structure at sites of growth and branching may well be different from that in older (non-growing) hyphae. This is consistent with the changes we observed over time, between the younger and older mycelia. Detailed localization of cell-wall modifying enzymes and of specific cell-wall modifications, in both time and space, is required to further reveal the role of the cell wall in the control of growth and development of streptomycetes.

## EXPERIMENTAL PROCEDURES

### Bacterial strain and culturing conditions

*Streptomyces coelicolor* A3(2) M145 (24) was obtained from the John Innes Centre strain collection. All media and methods for handling *Streptomyces* are described in the *Streptomyces* laboratory manual (24). Spores were collected from Soy Flour Mannitol (SFM) agar plates. Liquid cultures were grown shaking at 30°C in a flask with a spring, using normal minimal medium with phosphate (NMM+) supplemented with 1% (w/v) mannitol as the sole carbon source; polyethylene glycol (PEG) was omitted to avoid interference with the MS identification. Cultures were inoculated with spores at a density of  $10^6$  CFU/ML. A growth curve was constructed from dry-weight measurements by freeze-drying washed biomass obtained from 10 mL of culture broth (three biological replicates). The respective aliquots were immediately imaged to show the pellet morphology. Spores were collected from SFM agar plates by adding 0.01% (w/v) SDS to facilitate spore release from the aerial mycelium, scraping them off with a cotton ball and drawing the solution with a syringe. Spores were filtered with a cotton filter to separate spores from residual mycelium.

### PG extraction

Cells were lyophilized for a biomass measurement, 10 mg biomass was directly used for PG isolation. PG was isolated according to (25), using 2 mL screw-cap tubes for the entire isolation. Biomass was first boiled in 0.25% SDS in 0.1 M Tris/HCl pH 6.8, thoroughly washed, sonicated, treated with DNase, RNase and trypsin, inactivation of proteins by boiling and washing with water. Wall teichoic acids were removed with 1 M HCl. PG was digested with mutanolysin and lysozyme (1). Muropeptides were

reduced with sodium borohydride and the pH was adjusted to 3.5-4.5 with phosphoric acid.

To validate the method, we compared it to the method described previously (4). For this, *S. coelicolor* mycelia were grown in 1 L NMM+ media for 24 h. After washing of the mycelia, pellets were resuspended in boiling 5% (w/v) SDS and stirred vigorously for 20 min. Instead of sonicating the cells, they were disrupted using glass beads, followed by removal of the teichoic acids with an HF treatment at 4°C as described.

### **LC-MS analysis of monomers**

The LC-MS setup consisted of a Waters Acquity UPLC system (Waters, Milford, MA, USA) and a LTQ Orbitrap XL Hybrid Ion Trap-Orbitrap Mass Spectrometer (Thermo Fisher Scientific, Waltham, MA, USA) equipped with an Ion Max electrospray source. Chromatographic separation was performed on an Acquity UPLC HSS T3 C<sub>18</sub> column (1.8 µm, 100 Å, 2.1 × 100 mm). Mobile phase A consist of 99.9% H<sub>2</sub>O and 0,1% Formic Acid and mobile phase B consists of 95% Acetonitrile, 4.9% H<sub>2</sub>O and 0,1% Formic Acid. All solvents used were of LC-MS grade or better. The flow rate was set to 0.5 ml/min. The binary gradient program consisted of 1 min 98% A, 12 min from 98% A to 85% A, and 2 min from 85% A to 0% A. The column was then flushed for 3 min with 100% B, the gradient was then set to 98% A and the column was equilibrated for 8 min. The column temperature was set to 30°C and the injection volume used was 5 µL. The temperature of the autosampler tray was set to 8°C. Samples were run in triplicates.

MS/MS was done both on the full chromatogram by data dependent MS/MS and on specific peaks by selecting the mass of interest. Data dependent acquisition

was performed on the most intense detected peaks, the activation type was Collision Induced Dissociation (CID). Selected MS/MS was performed when the resolution of a data dependent acquisition lacked decisive information. MS/MS experiments in the ion trap were carried out with relative collision energy of 35% and the trapping of product ions were carried out with a q-value of 0.25, and the product ions were analyzed in the ion trap., data was collected in the positive ESI mode with a scan range of  $m/z$  500–3000 in high range mode. The resolution was set to 15.000 (at  $m/z$  400).

## Data analysis

Chromatograms were evaluated using the free software package MZmine (<http://mzmine.sourceforge.net/> (47)) to detect peaks, deconvolute the data and align the peaks. Only peaks corresponding with a mass corresponding to a muropeptide were saved, other data was discarded. The online tool MetaboAnalyst (69) was used to normalize the data by the sum of the total peak areas, then normalize the data by log transformation. The normalized peak areas were exported and a final table which shows peak areas as percentage of the whole was produced in Microsoft Excel.

## Muropeptide identification

The basic structure of the peptidoglycan of *S. coelicolor* has been published previously (21). Combinations of modifications were predicted and the masses were calculated using ChemDraw Professional (PerkinElmer). When a major peak had an unexpected mass, MS/MS helped resolve the structure. MS/MS was used to identify differences in cross-linking and to confirm predicted structures.



366

## 367 **Acknowledgments**

368 This work is part of the profile area Antibiotics of the Faculty of Sciences of Leiden  
369 University.

370

## 371 **Conflict of interest statement**

372 The authors declare that they have no conflicts of interest with the contents of this  
373 article.

374

## 375 **Author contributions**

376 LvdA performed the experiments with the help of GS. LvdA and GvW conceived the  
377 study. LvdA, AH, TH and GvW wrote the article with the help of WV. All authors  
378 approved the final manuscript.

379

380

## REFERENCES

1. Arbeloa A, Hugonnet JE, Sentilhes AC, Josseaume N, Dubost L, Monsempes C, Blanot D, Brouard JP, Arthur M. 2004. Synthesis of mosaic peptidoglycan cross-bridges by hybrid peptidoglycan assembly pathways in gram-positive bacteria. *J Biol Chem* 279:41546-56.
2. Barka EA, Vatsa P, Sanchez L, Gavaut-Vaillant N, Jacquard C, Meier-Kolthoff J, Klenk HP, Clément C, Oudouch Y, van Wezel GP. 2016. Taxonomy, physiology, and natural products of the *Actinobacteria*. *Microbiol Mol Biol Rev* 80:1-43.
3. Bornikoel J, Carrion A, Fan Q, Flores E, Forchhammer K, Mariscal V, Mullineaux CW, Perez R, Silber N, Wolk CP, Maldener I. 2017. Role of Two Cell Wall Amidases in Septal Junction and Nanopore Formation in the Multicellular *Cyanobacterium Anabaena* sp. PCC 7120. *Front Cell Infect Microbiol* 7:386.
4. Bui NK, Eberhardt A, Vollmer D, Kern T, Bougault C, Tomasz A, Simorre JP, Vollmer W. 2012. Isolation and analysis of cell wall components from *Streptococcus pneumoniae*. *Anal Biochem* 421:657-66.
5. Cameron TA, Anderson-Furgeson J, Zupan JR, Zik JJ, Zambryski PC. 2014. Peptidoglycan synthesis machinery in *Agrobacterium tumefaciens* during unipolar growth and cell division. *MBio* 5:e01219-14.
6. Celler K, Koning RI, Koster AJ, van Wezel GP. 2013. Multidimensional view of the bacterial cytoskeleton. *J Bacteriol* 195:1627-36.
7. Celler K, Koning RI, Willemse J, Koster AJ, van Wezel GP. 2016. Cross-membranes orchestrate compartmentalization and morphogenesis in *Streptomyces*. *Nat Comm* 7:11836.
8. Claessen D, Rozen DE, Kuipers OP, Sogaard-Andersen L, van Wezel GP. 2014. Bacterial solutions to multicellularity: a tale of biofilms, filaments and fruiting bodies. *Nat Rev Microbiol* 12:115-24.
9. Egan AJ, Cleverley RM, Peters K, Lewis RJ, Vollmer W. 2017. Regulation of bacterial cell wall growth. *FEBS J* 284:851-867.
10. Engelberg-Kulka H, Amitai S, Kolodkin-Gal I, Hazan R. 2006. Bacterial programmed cell death and multicellular behavior in bacteria. *PLoS Genet* 2:e135.
11. Flärdh K, Buttner MJ. 2009. *Streptomyces* morphogenetics: dissecting differentiation in a filamentous bacterium. *Nat Rev Microbiol* 7:36-49.
12. Gao C, Hindra, Mulder D, Yin C, Elliot MA. 2012. Crp is a global regulator of antibiotic production in *Streptomyces*. *MBio* 3:00407-12.
13. Glauner B. 1988. Separation and quantification of muropeptides with high-performance liquid chromatography. *Anal Biochem* 172:451-64.
14. Guiral S, Mitchell TJ, Martin B, Claverys JP. 2005. Competence-programmed predation of noncompetent cells in the human pathogen *Streptococcus pneumoniae*: genetic requirements. *Proc Natl Acad Sci U S A* 102:8710-5.
15. Haiser HJ, Yousef MR, Elliot MA. 2009. Cell wall hydrolases affect germination, vegetative growth, and sporulation in *Streptomyces coelicolor*. *J Bacteriol* 191:6501-12.
16. Hammes W, Schleifer KH, Kandler O. 1973. Mode of action of glycine on the biosynthesis of peptidoglycan. *J Bacteriol* 116:1029-53.
17. Heidrich C, Ursinus A, Berger J, Schwarz H, Holtje JV. 2002. Effects of multiple deletions of murein hydrolases on viability, septum cleavage, and sensitivity to large toxic molecules in *Escherichia coli*. *J Bacteriol* 184:6093-9.
18. Hochman A. 1997. Programmed cell death in prokaryotes. *Crit Rev Microbiol* 23:207-14.
19. Holmes NA, Walshaw J, Leggett RM, Thibessard A, Dalton KA, Gillespie MD, Hemmings AM, Gust B, Kelemen GH. 2013. Coiled-coil protein Scy is a key component of a multiprotein assembly controlling polarized growth in *Streptomyces*. *Proc Natl Acad Sci U S A* 110:E397-406.
20. Hopwood DA, Wright HM, Bibb MJ, Cohen SN. 1977. Genetic recombination through protoplast fusion in *Streptomyces*. *Nature* 268:171-4.

21. Hugonnet JE, Haddache N, Veckerle C, Dubost L, Marie A, Shikura N, Mainardi JL, Rice LB, Arthur M. 2014. Peptidoglycan cross-linking in glycopeptide-resistant *Actinomycetales*. *Antimicrob Agents Chemother* 58:1749-56.
22. Jakimowicz D, van Wezel GP. 2012. Cell division and DNA segregation in *Streptomyces*: how to build a septum in the middle of nowhere? *Mol Microbiol* 85:393-404.
23. Keep NH, Ward JM, Cohen-Gonsaud M, Henderson B. 2006. Wake up! Peptidoglycan lysis and bacterial non-growth states. *Trends Microbiol* 14:271-6.
24. Kieser T, Bibb MJ, Buttner MJ, Chater KF, Hopwood DA. 2000. *Practical Streptomyces* genetics. John Innes Foundation, Norwich, U.K.
25. Kühner D, Stahl M, Demircioglu DD, Bertsche U. 2014. From cells to mucopeptide structures in 24 h: peptidoglycan mapping by UPLC-MS. *Sci Rep* 4:7494.
26. Kuru E, Tekkam S, Hall E, Brun YV, Van Nieuwenhze MS. 2015. Synthesis of fluorescent D-amino acids and their use for probing peptidoglycan synthesis and bacterial growth in situ. *Nat Protoc* 10:33-52.
27. Kysela DT, Randich AM, Caccamo PD, Brun YV. 2016. Diversity Takes Shape: Understanding the Mechanistic and Adaptive Basis of Bacterial Morphology. *PLoS Biol* 14:e1002565.
28. Lavollay M, Arthur M, Fourgeaud M, Dubost L, Marie A, Riegel P, Gutmann L, Mainardi JL. 2009. The beta-lactam-sensitive D,D-carboxypeptidase activity of Pbp4 controls the L,D and D,D transpeptidation pathways in *Corynebacterium jeikeium*. *Mol Microbiol* 74:650-61.
29. Lavollay M, Arthur M, Fourgeaud M, Dubost L, Marie A, Veziris N, Blanot D, Gutmann L, Mainardi JL. 2008. The peptidoglycan of stationary-phase *Mycobacterium tuberculosis* predominantly contains cross-links generated by L,D-transpeptidation. *J Bacteriol* 190:4360-6.
30. Leclercq S, Derouaux A, Olatunji S, Fraipont C, Egan AJ, Vollmer W, Breukink E, Terrak M. 2017. Interplay between Penicillin-binding proteins and SEDS proteins promotes bacterial cell wall synthesis. *Sci Rep* 7:43306.
31. Lyons NA, Kolter R. 2015. On the evolution of bacterial multicellularity. *Curr Opin Microbiol* 24:21-8.
32. Mainardi JL, Fourgeaud M, Hugonnet JE, Dubost L, Brouard JP, Ouazzani J, Rice LB, Gutmann L, Arthur M. 2005. A novel peptidoglycan cross-linking enzyme for a beta-lactam-resistant transpeptidation pathway. *J Biol Chem* 280:38146-52.
33. Manteca A, Fernandez M, Sanchez J. 2005. A death round affecting a young compartmentalized mycelium precedes aerial mycelium dismantling in confluent surface cultures of *Streptomyces antibioticus*. *Microbiology* 151:3689-97.
34. Manteca A, Fernandez M, Sanchez J. 2005. Mycelium development in *Streptomyces antibioticus* ATCC11891 occurs in an orderly pattern which determines multiphase growth curves. *BMC microbiology* 5:51.
35. Manteca A, Mader U, Connolly BA, Sanchez J. 2006. A proteomic analysis of *Streptomyces coelicolor* programmed cell death. *Proteomics* 6:6008-22.
36. McCormick JR. 2009. Cell division is dispensable but not irrelevant in *Streptomyces*. *Curr Opin Biotechnol* 12:689-98.
37. Meyrand M, Boughammoura A, Courtin P, Mezange C, Guillot A, Chapot-Chartier MP. 2007. Peptidoglycan N-acetylglucosamine deacetylation decreases autolysis in *Lactococcus lactis*. *Microbiology* 153:3275-85.
38. Miguez EM, Hardisson C, Manzanal MB. 1999. Hyphal death during colony development in *Streptomyces antibioticus*: morphological evidence for the existence of a process of cell deletion in a multicellular prokaryote. *J Cell Biol* 145:515-25.
39. Morales Angeles D, Liu Y, Hartman AM, Borisova M, de Sousa Borges A, de Kok N, Beilharz K, Veening JW, Mayer C, Hirsch AK, Scheffers DJ. 2017. Pentapeptide-rich peptidoglycan at the *Bacillus subtilis* cell-division site. *Mol Microbiol* 104:319-333.
40. Ning SB, Guo HL, Wang L, Song YC. 2002. Salt stress induces programmed cell death in prokaryotic organism *Anabaena*. *J Appl Microbiol* 93:15-28.

- 484 41. Noens EE, Mersinias V, Traag BA, Smith CP, Koerten HK, van Wezel GP. 2005. SsgA-like  
485 proteins determine the fate of peptidoglycan during sporulation of *Streptomyces coelicolor*.  
486 Mol Microbiol 58:929-44.
- 487 42. Noens EE, Mersinias V, Willemse J, Traag BA, Laing E, Chater KF, Smith CP, Koerten HK, van  
488 Wezel GP. 2007. Loss of the controlled localization of growth stage-specific cell-wall synthesis  
489 pleiotropically affects developmental gene expression in an *ssgA* mutant of *Streptomyces*  
490 *coelicolor*. Mol Microbiol 64:1244-59.
- 491 43. Okanishi M, Suzuki K, Umezawa H. 1974. Formation and reversion of *Streptomyces*  
492 protoplasts: cultural condition and morphological study. J Gen Microbiol 80:389-400.
- 493 44. Okoro CK, Brown R, Jones AL, Andrews BA, Asenjo JA, Goodfellow M, Bull AT. 2009. Diversity  
494 of culturable actinomycetes in hyper-arid soils of the Atacama Desert, Chile. Antonie Van  
495 Leeuwenhoek 95:121-33.
- 496 45. Peters K, Kannan S, Rao VA, Biboy J, Vollmer D, Erickson SW, Lewis RJ, Young KD, Vollmer W.  
497 2016. The Redundancy of Peptidoglycan Carboxypeptidases Ensures Robust Cell Shape  
498 Maintenance in *Escherichia coli*. MBio 7.
- 499 46. Piette A, Derouaux A, Gerkens P, Noens EE, Mazzucchelli G, Vion S, Koerten HK, Titgemeyer F,  
500 De Pauw E, Leprince P, van Wezel GP, Galleni M, Rigali S. 2005. From dormant to  
501 germinating spores of *Streptomyces coelicolor* A3(2): new perspectives from the *crp* null  
502 mutant. J Proteome Res 4:1699-708.
- 503 47. Pluskal T, Castillo S, Villar-Briones A, Oresic M. 2010. MZmine 2: modular framework for  
504 processing, visualizing, and analyzing mass spectrometry-based molecular profile data. BMC  
505 Bioinformatics 11:395.
- 506 48. Popham DL. 2002. Specialized peptidoglycan of the bacterial endospore: the inner wall of the  
507 lockbox. Cell Mol Life Sci 59:426-33.
- 508 49. Popham DL, Helin J, Costello CE, Setlow P. 1996. Analysis of the peptidoglycan structure of  
509 *Bacillus subtilis* endospores. J Bacteriol 178:6451-8.
- 510 50. Popham DL, Helin J, Costello CE, Setlow P. 1996. Muramic lactam in peptidoglycan of *Bacillus*  
511 *subtilis* spores is required for spore outgrowth but not for spore dehydration or heat  
512 resistance. Proc Natl Acad Sci U S A 93:15405-10.
- 513 51. Rice KC, Bayles KW. 2003. Death's toolbox: examining the molecular components of  
514 bacterial programmed cell death. Mol Microbiol 50:729-38.
- 515 52. Rigali S, Titgemeyer F, Barends S, Mulder S, Thomae AW, Hopwood DA, van Wezel GP. 2008.  
516 Feast or famine: the global regulator DasR links nutrient stress to antibiotic production by  
517 *Streptomyces*. EMBO Rep 9:670-5.
- 518 53. Rioseras B, Yague P, Lopez-Garcia MT, Gonzalez-Quinonez N, Binda E, Marinelli F, Manteca  
519 A. 2016. Characterization of SCO4439, a D-alanyl-D-alanine carboxypeptidase involved in  
520 spore cell wall maturation, resistance, and germination in *Streptomyces coelicolor*. Sci Rep  
521 6:21659.
- 522 54. Sacco E, Hugonnet JE, Josseume N, Cremniter J, Dubost L, Marie A, Patin D, Blanot D, Rice  
523 LB, Mainardi JL, Arthur M. 2010. Activation of the L,D-transpeptidation peptidoglycan cross-  
524 linking pathway by a metallo-D,D-carboxypeptidase in *Enterococcus faecium*. Mol Microbiol  
525 75:874-85.
- 526 55. Sanders AN, Wright LF, Pavelka MS, Jr. 2014. Genetic characterization of mycobacterial L,D-  
527 transpeptidases. Microbiology 160:1795-806.
- 528 56. Schleifer KH, Kandler O. 1972. Peptidoglycan Types of Bacterial Cell-Walls and Their  
529 Taxonomic Implications. Bacteriol Rev 36:407-477.
- 530 57. Sham LT, Butler EK, Lebar MD, Kahne D, Bernhardt TG, Ruiz N. 2014. Bacterial cell wall. MurJ  
531 is the flippase of lipid-linked precursors for peptidoglycan biogenesis. Science 345:220-2.
- 532 58. Shapiro JA. 1988. Bacteria as multicellular organisms. Sci Am 256:82-89.
- 533 59. Sogaard-Andersen L, Yang Z. 2008. Programmed cell death: role for MazF and MrpC in  
534 *Myxococcus* multicellular development. Curr Biol 18:R337-9.

60. Takacs CN, Hocking J, Cabeen MT, Bui NK, Poggio S, Vollmer W, Jacobs-Wagner C. 2013. Growth medium-dependent glycine incorporation into the peptidoglycan of *Caulobacter crescentus*. PLoS One 8:e57579.
61. Tenconi E, Traxler M, Hoebreck C, van Wezel GP, Rigali S. 2018. Prodiginine production in *Streptomyces coelicolor* correlates temporally and spatially to programmed cell death. BioRxiv <https://doi.org/10.1101/240689>
62. Urem M, Swiatek-Polatynska MA, Rigali S, van Wezel GP. 2016. Intertwining nutrient-sensory networks and the control of antibiotic production in *Streptomyces*. Mol Microbiol 102:183-195.
63. van der Meij A, Worsley SF, Hutchings MI, van Wezel GP. 2017. Chemical ecology of antibiotic production by actinomycetes. FEMS Microbiol Rev 41:392-416.
64. van Dissel D, Claessen D, Van Wezel GP. 2014. Morphogenesis of *Streptomyces* in submerged cultures. Adv Appl Microbiol 89:1-45.
65. Vollmer W. 2008. Structural variation in the glycan strands of bacterial peptidoglycan. FEMS Microbiol Rev 32:287-306.
66. Vollmer W, Blanot D, de Pedro MA. 2008. Peptidoglycan structure and architecture. FEMS Microbiol Rev 32:149-67.
67. Vollmer W, Joris B, Charlier P, Foster S. 2008. Bacterial peptidoglycan (murein) hydrolases. FEMS Microbiol Rev 32:259-86.
68. Wolanski M, Wali R, Tilley E, Jakimowicz D, Zakrzewska-Czerwinska J, Herron P. 2011. Replisome trafficking in growing vegetative hyphae of *Streptomyces coelicolor* A3(2). J Bacteriol 193:1273-5.
69. Xia J, Sinelnikov IV, Han B, Wishart DS. 2015. MetaboAnalyst 3.0--making metabolomics more meaningful. Nucleic Acids Res 43:W251-7.
70. Yague P, Lopez-Garcia MT, Rioseras B, Sanchez J, Manteca A. 2013. Pre-sporulation stages of *Streptomyces* differentiation: state-of-the-art and future perspectives. FEMS Microbiol Lett 342:79-88.
71. Yague P, Manteca A, Simon A, Diaz-Garcia ME, Sanchez J. 2010. New method for monitoring programmed cell death and differentiation in submerged *Streptomyces* cultures. Appl Environ Microbiol 76:3401-4.
72. Zhang Z, Claessen D, Rozen DE. 2016. Understanding Microbial Divisions of Labor. Front Microbiol 7:2070.

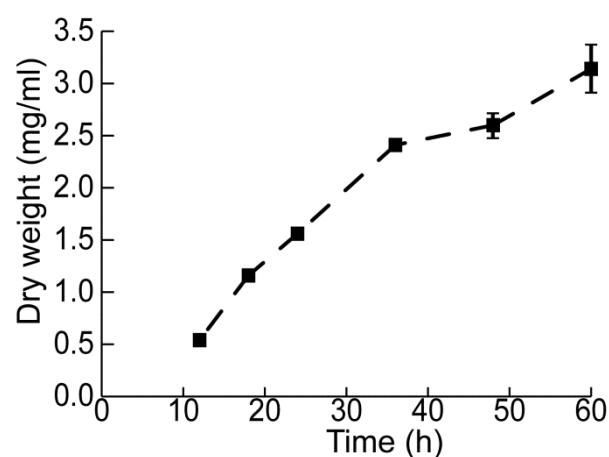

**Figure 1.** Growth of *S.coelicolor* on NMM+ medium based on triplicate dry weight measurements.

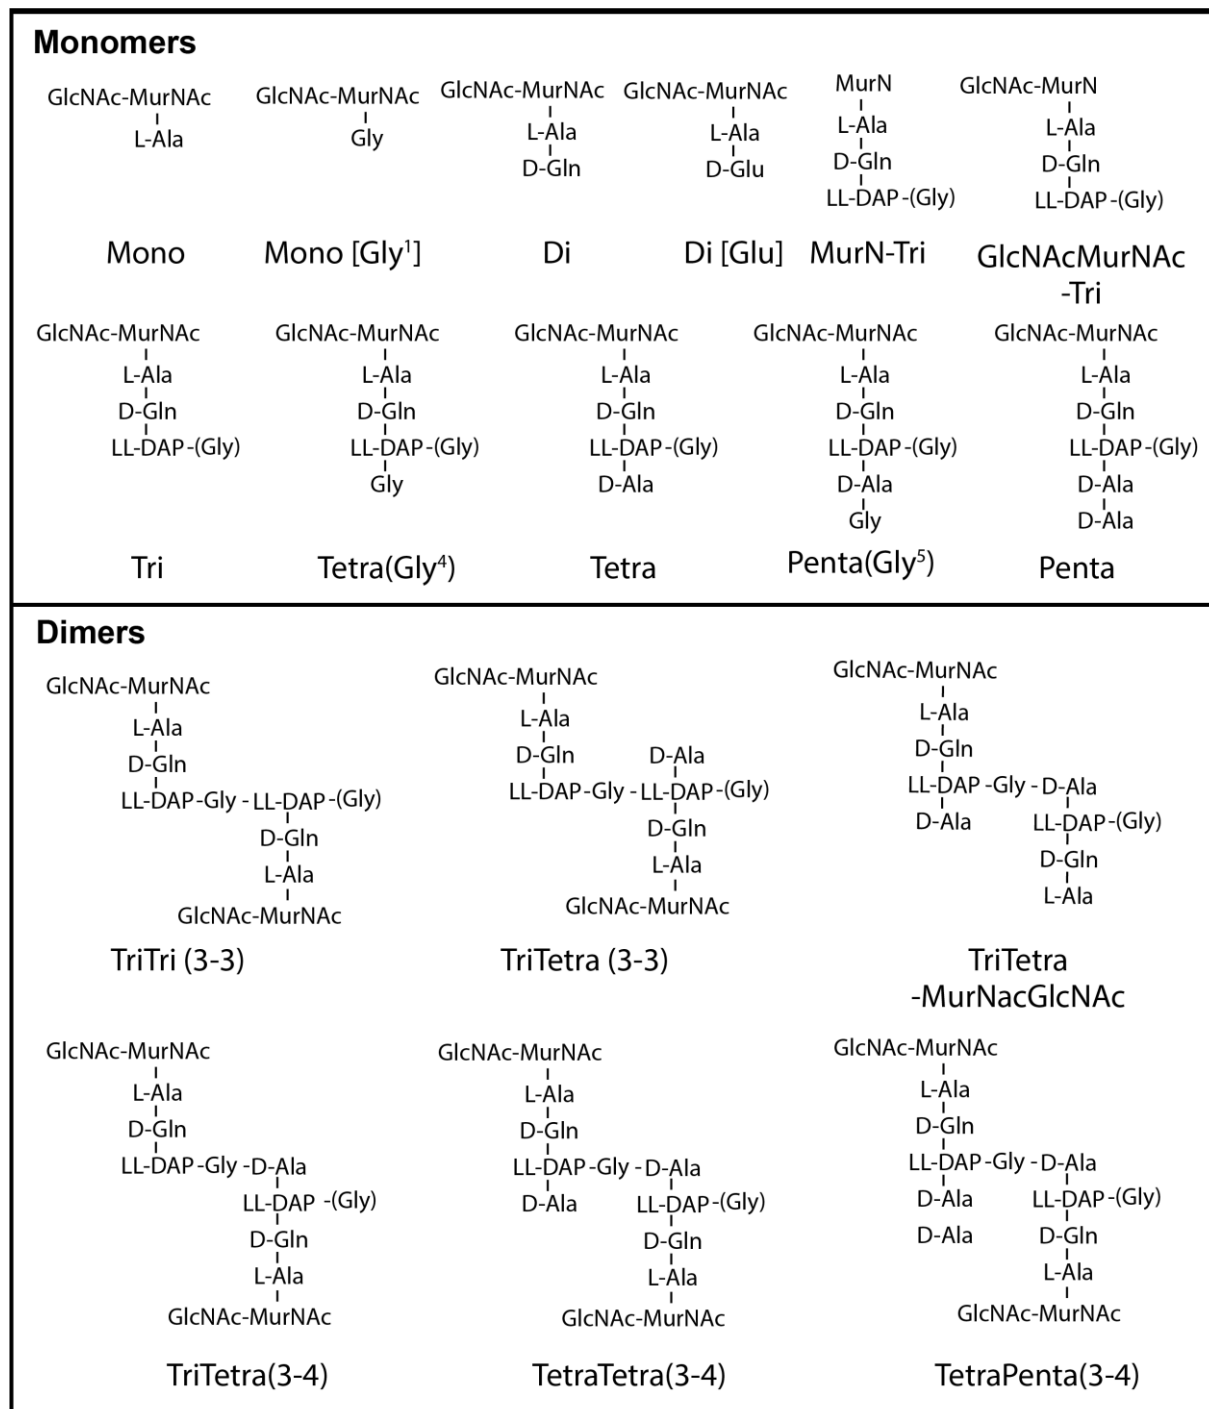

**Figure 2.** Summary of structures of main monomers and dimers observed in PG from *S. coelicolor*.



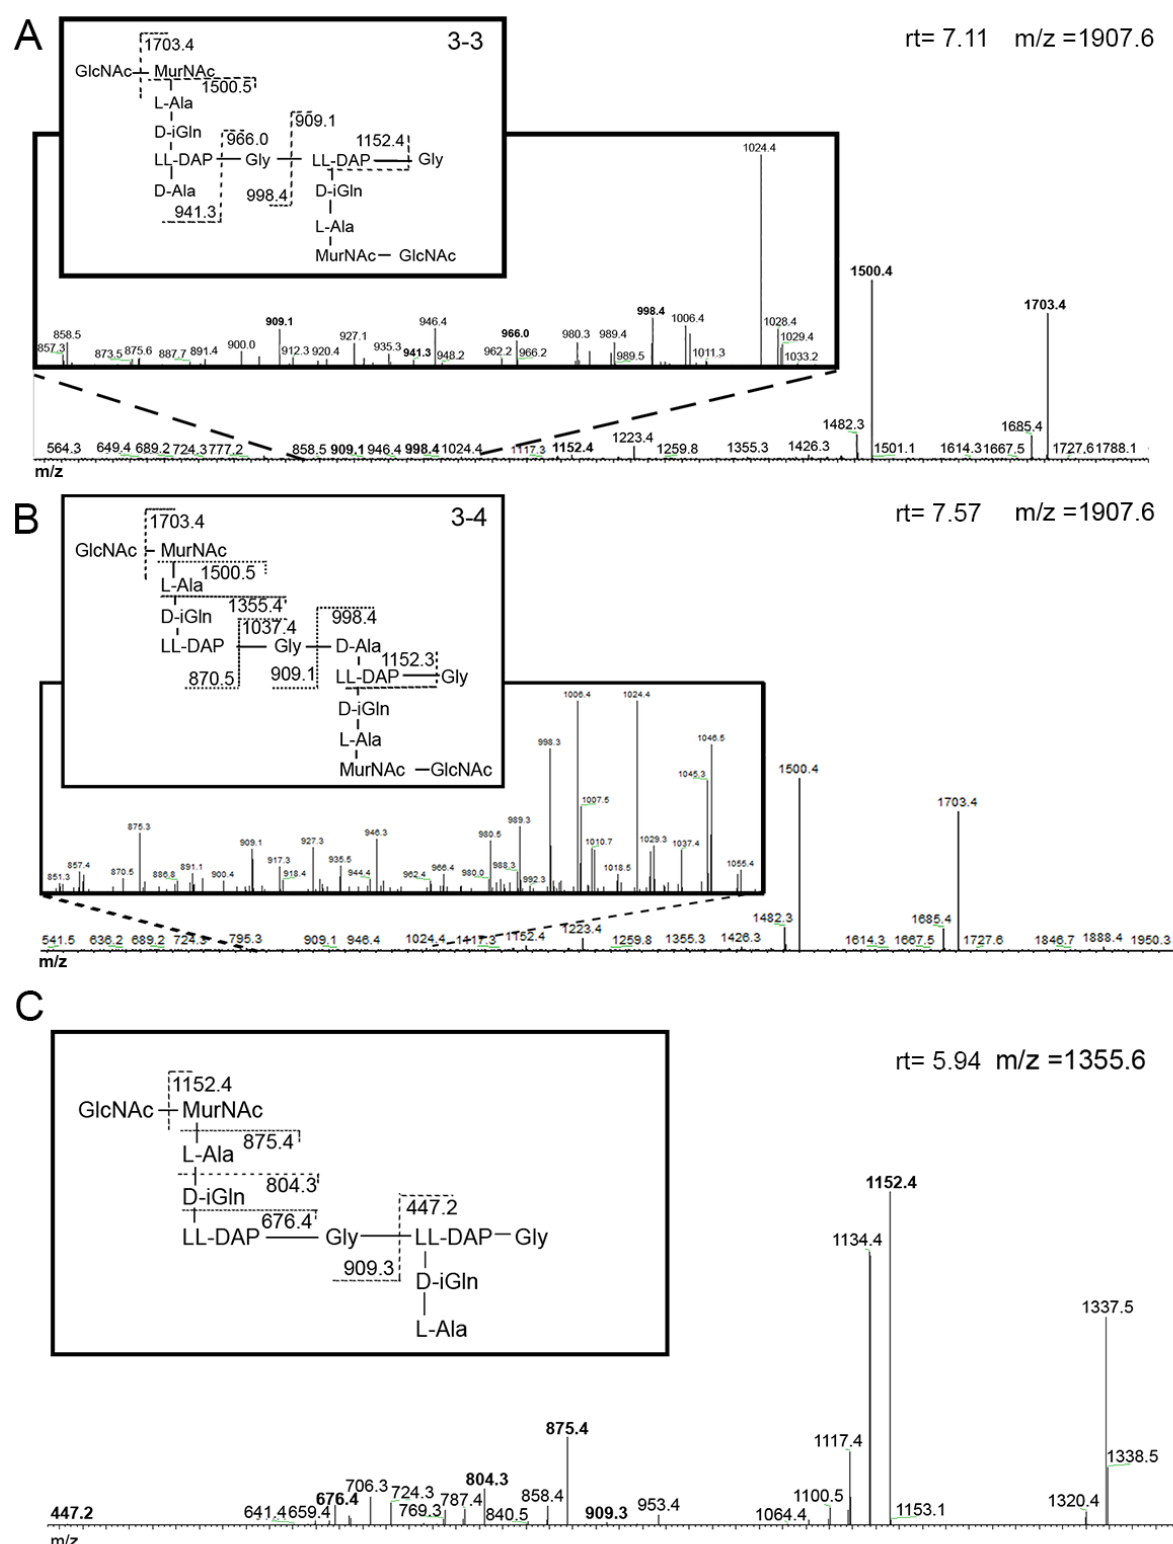

578

579 **Figure 3.** MS/MS fragmentations of TetraTri dimers with either 3-3 cross-link (A) or 3-  
580 4 cross-link (B). Differentiation between these two types of cross-links is possible at  
581 the point of asymmetry, at Gly attached to LL-DAP. The 3-3 cross-linked dimer (A)



fragments into masses of 966.0 m/z and 941.3 m/z, which can be found in the respective MS/MS spectrum. The 3-4 cross-linked dimer (B) fragments into masses of 1037.4 m/z and 870.5 m/z. These masses are found in the MS/MS spectrum. Boxed MS/MS spectra show a magnification of masses between m/z 850 and 1050 to show masses present in lower abundance. (C) a TriTri dimer lacking GlcNAcMurNAc with an M+H of 1355.6, diagnostic fragments are given in the proposed structures.

591 **Table 1.** Relative abundance(%) of muropeptides in vegetative cells and spores.

| <b>Monomers<sup>a</sup></b>      | <b>18h</b> | <b>24h</b> | <b>36h</b> | <b>48h</b> | <b>spores</b> |
|----------------------------------|------------|------------|------------|------------|---------------|
| Mono                             | 1.6%       | 2.1%       | 3.3%       | 3.3%       | 4.5%          |
| Di                               | 14.2%      | 15.5%      | 14.5%      | 13.2%      | 13.1%         |
| Tri                              | 27.4%      | 32.2%      | 35.1%      | 35.8%      | 28.1%         |
| Tetra                            | 26.7%      | 24.4%      | 23.9%      | 23.9%      | 48.3%         |
| Tetra(Gly)                       | 3.5%       | 5.3%       | 6.9%       | 8.2%       | 2.3%          |
| Penta                            | 22.7%      | 16.9%      | 13.1%      | 12.9%      | 5.3%          |
| Penta(Gly)                       | 4.7%       | 4.8%       | 4.7%       | 4.4%       | 4.0%          |
| Deacetylated                     | 3.9%       | 6.0%       | 7.9%       | 8.0%       | 4.5%          |
| Glutamate                        | 67.6%      | 63.4%      | 62.6%      | 66.3%      | 74.0%         |
| Missing GlcNAc                   | 0.7%       | 1.6%       | 2.1%       | 3.3%       | 4.8%          |
| MurN-Tri                         | 0.1%       | 0.7%       | 1.2%       | 2.3%       | 3.5%          |
| GlcNAcMurN-Tri                   | 2.2%       | 2.8%       | 3.4%       | 2.6%       | 0.2%          |
|                                  |            |            |            |            |               |
| <b>Dimers<sup>a</sup></b>        | <b>18h</b> | <b>24h</b> | <b>36h</b> | <b>48h</b> | <b>spores</b> |
| TriTri (3-3)                     | 4.1%       | 4.8%       | 6.5%       | 7.0%       | 4.9%          |
| TriTetra(3-3)                    | 23.9%      | 24.2%      | 22.3%      | 16.9%      | 19.1%         |
| TriTetra(3-4)                    | 1.0%       | 8.7%       | 8.2%       | 6.1%       | 4.7%          |
| TetraTetra(3-4)                  | 23.3%      | 13.5%      | 10.1%      | 8.6%       | 38.9%         |
| TetraPenta (3-4)                 | 24.6%      | 9.1%       | 5.6%       | 3.0%       | 0.7%          |
| Deacetylated                     | 1.8%       | 1.2%       | 1.5%       | 1.2%       | 0.4%          |
| Glutamate                        | 66.5%      | 61.1%      | 62.8%      | 62.0%      | 70.5%         |
| Missing GlcNAc                   | 0.3%       | 0.6%       | 1.1%       | 1.2%       | 0.1%          |
| Missing (GlcNAc-MurNAc)          | 24.3%      | 37.2%      | 44.6%      | 56.1%      | 30.4%         |
| Proportion(%) of 3-3 cross-links | 36.5%      | 48.0%      | 54.5%      | 57.3%      | 35.1%         |

592 <sup>a</sup>Monomers and dimers are treated as separate datasets.

593
